# Supplementary material
Source: publisher site journal article supplement (https://www.dovepress.com/get_supplementary_file.php?f=378964.docx)
Supplement: Supplementary file 1 [file get_supplementary_file.php]

**First-trimester triglyceride-glucose index and risk of pregnancy-related complications: a prospective birth cohort study in Southeast China**

**Supplementary Materials**


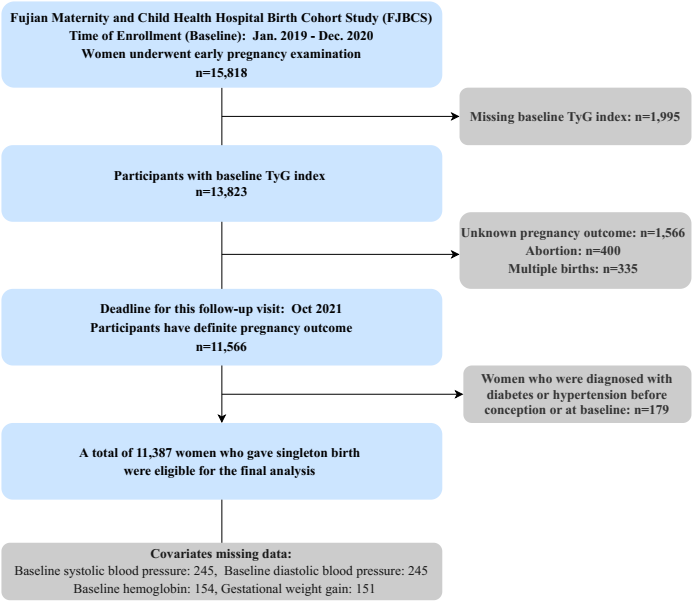


**Supplementary Figure 1 Participant flowchart**


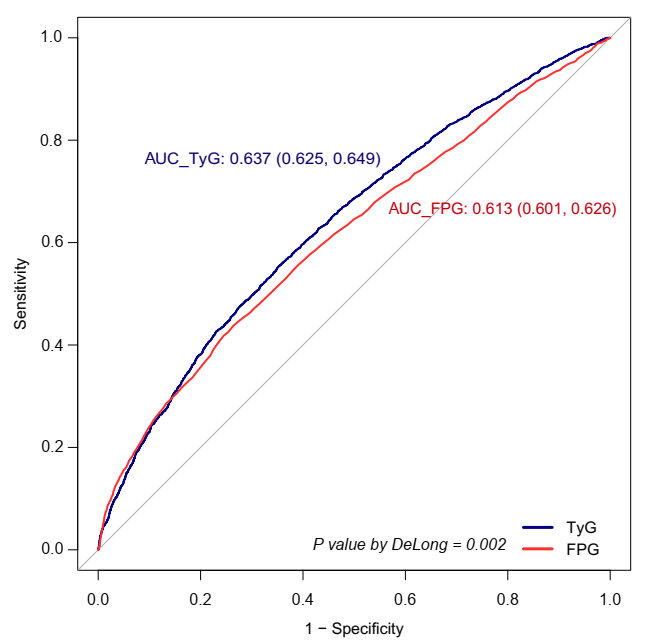


**Supplementary Figure 2 Receiver operating characteristic curves of triglyceride-glucose (TyG) index and fasting plasma glucose (FPG) used to predict gestational diabetes mellitus development**

The blue line represents triglyceride-glucose (TyG) index and the red line indicates fasting plasma glucose (FPG).

**Supplementary Table 1 Anthropometric and biochemical characteristics of the participants according to triglyceride-glucose (TyG) index quintiles in sensitivity analysis dataset**

| **Variables** | **Overall** | **TyG index quintiles (n, range)** | | | | | ***P value*** |
| --- | --- | --- | --- | --- | --- | --- | --- |
|  | **Total (n = 10,836)** | **Q1 (n = 2,167)**  **(7.36~8.19)** | **Q2 (n = 2,167)**  **(8.20~8.38)** | **Q3 (n = 2,167)**  **(8.38~8.55)** | **Q4 (n = 2,166)**  **(8.55~8.76)** | **Q5 (n = 2,169)**  **(8.76~9.89)** |  |
| Race-Han, n(%) | 10836 (100.0) | 2167 (100) | 2167 (100) | 2167 (100) | 2166 (100) | 2169 (100) |  |
| Maternal age, years | 30.0 ± 4.0 | 29.2 ± 3.7 | 29.4 ± 3.8 | 30.0 ± 4.0 | 30.4 ± 4.0 | 31.1 ± 4.1 | < 0.001 |
| Pre-pregnancy BMI, kg/m2 | 21.1 ± 2.8 | 20.2 ± 2.4 | 20.6 ± 2.6 | 20.8 ± 2.6 | 21.3 ± 2.9 | 22.4 ± 3.2 | < 0.001 |
| Assisted reproduction, n (%) | 567 ( 5.2) | 64 (3) | 79 (3.6) | 96 (4.4) | 141 (6.5) | 187 (8.6) |  |
| Abortion history, n (%) | 3982 (36.7) | 655 (30.2) | 731 (33.7) | 773 (35.7) | 873 (40.3) | 950 (43.8) |  |
| Gravidity, n(%) |  |  |  |  |  |  | < 0.001 |
| 1 | 4653 (42.9) | 1187 (54.8) | 1049 (48.4) | 948 (43.7) | 806 (37.2) | 663 (30.6) |  |
| 2 | 3267 (30.1) | 536 (24.7) | 614 (28.3) | 646 (29.8) | 729 (33.7) | 742 (34.2) |  |
| 3 | 1775 (16.4) | 273 (12.6) | 325 (15) | 349 (16.1) | 380 (17.5) | 448 (20.7) |  |
| ≥4 | 1141 (10.5) | 171 (7.9) | 179 (8.3) | 224 (10.3) | 251 (11.6) | 316 (14.6) |  |
| Parity, n(%) |  |  |  |  |  |  | < 0.001 |
| 0 | 6325 (58.4) | 1510 (69.7) | 1388 (64.1) | 1277 (58.9) | 1161 (53.6) | 989 (45.6) |  |
| 1 | 4066 (37.5) | 594 (27.4) | 696 (32.1) | 802 (37) | 916 (42.3) | 1058 (48.8) |  |
| ≥2 | 445 ( 4.1) | 63 (2.9) | 83 (3.8) | 88 (4.1) | 89 (4.1) | 122 (5.6) |  |
| Gestational week at  examination, weeks | 11.3 ± 1.1 | 11.1 ± 1.2 | 11.3 ± 1.1 | 11.3 ± 1.1 | 11.4 ± 1.0 | 11.5 ± 1.0 | < 0.001 |
| SBP, mmHg | 113.8 ± 10.8 | 111.7 ± 10.9 | 112.9 ± 10.6 | 113.6 ± 10.6 | 114.8 ± 11.1 | 116.1 ± 10.5 | < 0.001 |
| DBP, mmHg | 68.6 ± 8.5 | 66.8 ± 8.5 | 68.0 ± 8.4 | 68.5 ± 8.4 | 69.4 ± 8.4 | 70.2 ± 8.6 | < 0.001 |
| FPG, mg/dl | 85.6 ± 6.4 | 83.4 ± 6.1 | 84.7 ± 5.8 | 85.4 ± 6.0 | 86.4 ± 6.1 | 88.2 ± 6.9 | < 0.001 |
| TG, mg/dl | 111.6 (90.3, 139.9) | 75.3 (68.2, 81.5) | 94.7 (89.4, 100.1) | 111.6 (105.4, 117.8) | 132.8 (124.8, 140.8) | 174.4 (158.5, 201.9) | < 0.001 |
| Total cholesterol, mg/dl | 179.4 ± 28.3 | 166.5 ± 24.7 | 174.6 ± 25.6 | 179.4 ± 26.1 | 185.2 ± 27.6 | 191.4 ± 30.3 | < 0.001 |
| LDL-C, mg/dl | 92.4 ± 23.2 | 82.0 ± 20.0 | 88.3 ± 20.8 | 92.4 ± 21.5 | 97.1 ± 22.9 | 102.2 ± 25.3 | < 0.001 |
| HDL-C, mg/dl | 65.1 ± 11.7 | 67.0 ± 11.3 | 66.9 ± 11.7 | 65.9 ± 11.5 | 64.8 ± 11.5 | 60.7 ± 11.4 | < 0.001 |
| Hemoglobin, g/L | 127.4 ± 9.7 | 126.0 ± 9.6 | 126.9 ± 9.5 | 127.4 ± 9.6 | 128.0 ± 9.5 | 129.0 ± 9.9 | < 0.001 |
| Uric acid, μmoI/L | 231.7 (203.0, 264.5) | 224.6 (197.6, 254.2) | 227.5 (199.2, 260.3) | 230.6 (203.2, 260.6) | 232.4 (204.1, 266.2) | 244.2 (212.7, 280.6) | < 0.001 |
| Creatinine, μmoI/L | 43.0 (38.9, 47.2) | 42.8 (38.6, 46.9) | 43.1 (39.0, 47.2) | 43.1 (38.8, 47.2) | 43.2 (39.0, 47.5) | 43.1 (38.9, 47.2) | 0.312 |
| ALT, U/L | 12.6 (9.7, 17.9) | 11.9 (9.5, 16.2) | 12.2 (9.4, 16.9) | 12.2 (9.5, 17.3) | 12.9 (9.9, 18.9) | 13.9 (10.4, 20.3) | < 0.001 |
| AST, U/L | 16.4 (14.2, 19.1) | 16.4 (14.3, 18.8) | 16.3 (14.3, 18.9) | 16.3 (14.2, 18.9) | 16.4 (14.3, 19.4) | 16.5 (14.2, 19.6) | 0.046 |
| Delivery gestations, weeks | 39.2 ± 1.5 | 39.3 ± 1.5 | 39.3 ± 1.5 | 39.2 ± 1.4 | 39.2 ± 1.5 | 39.0 ± 1.6 | < 0.001 |
| Gestational weight gain, kg | 13.5 ± 4.9 | 14.3 ± 4.6 | 14.0 ± 4.5 | 13.6 ± 4.7 | 13.2 ± 5.2 | 12.4 ± 5.4 | < 0.001 |
| Gestational weight gain, n(%) | |  |  |  |  |  | < 0.001 |
| <recommendation | 3511 (32.4) | 596 (27.5) | 597 (27.5) | 719 (33.2) | 743 (34.3) | 856 (39.5) |  |
| Within recommendation | 4269 (39.4) | 877 (40.5) | 922 (42.5) | 841 (38.8) | 842 (38.9) | 787 (36.3) |  |
| >recommendation | 3056 (28.2) | 694 (32) | 648 (29.9) | 607 (28) | 581 (26.8) | 526 (24.3) |  |

Abbreviations: ALT, alanine aminotransferase; AST, aspartate aminotransferase; DBP, diastolic blood pressure; HDL-C, high density lipoprotein cholesterol; LDL-C, low density lipoprotein cholesterol; SBP, systolic blood pressure; TC, total cholesterol.

Data are presented as mean ± standard deviation, median (interquartile range) or n (%).

**Supplementary Table 2 Association of triglyceride-glucose (TyG) index with gestational diabetes mellitus (GDM) in sensitivity analysis dataset**

| **Predictor** | **Number** | **GDM, n (%)** | **Crude** |  | **Model 1 a** |  | **Model 2 b** |  |
| --- | --- | --- | --- | --- | --- | --- | --- | --- |
|  |  |  | ***OR (95%CI)*** | ***P value*** | ***OR (95%CI)*** | ***P value*** | ***OR (95%CI)*** | ***P value*** |
| TyG index, per unit | 10836 | 2620 (24.2) | 4.35 (3.81~4.97) | **<0.001** | 3.13 (2.71~3.62) | **<0.001** | 3.60 (2.93~4.41) | **<0.001** |
| TyG index, per SD | 10836 | 2620 (24.2) | 1.66 (1.58~1.73) | **<0.001** | 1.48 (1.41~1.56) | **<0.001** | 1.55 (1.45~1.67) | **<0.001** |
| TyG index Quintile 1 | 2167 | 314 (14.5) | 1(Ref) |  | 1(Ref) |  | 1(Ref) |  |
| Quintile 2 | 2167 | 386 (17.8) | 1.28 (1.09~1.50) | **0.003** | 1.23 (1.04~1.46) | **0.014** | 1.21 (1.02~1.43) | **0.025** |
| Quintile 3 | 2167 | 470 (21.7) | 1.63 (1.40~1.91) | **<0.001** | 1.45 (1.23~1.70) | **<0.001** | 1.41 (1.19~1.67) | **<0.001** |
| Quintile 4 | 2166 | 612 (28.3) | 2.32 (2.00~2.71) | **<0.001** | 1.96 (1.67~2.29) | **<0.001** | 1.89 (1.59~2.24) | **<0.001** |
| Quintile 5 | 2169 | 838 (38.6) | 3.72 (3.21~4.31) | **<0.001** | 2.69 (2.30~3.15) | **<0.001** | 2.53 (2.09~3.08) | **<0.001** |
| Trend test |  |  |  | **<0.001** |  | **<0.001** |  | **<0.001** |

**a** Model 1 adjusted for pre-pregnancy BMI, maternal age, assisted reproduction, abortion history, gravidity, parity, delivery gestations, and gestational weight gain;

**b** Model 2 further adjusted for gestational week at the examination, systolic blood pressure, diastolic blood pressure, total cholesterol, low density lipoprotein cholesterol, high density lipoprotein cholesterol, hemoglobin, uric acid, creatinine, alanine aminotransferase, and aspartate aminotransferase.

The bolded P values indicates statistical significance.

**Supplementary Table 3 Association of triglyceride-glucose (TyG) index with other pregnancy-related complications in sensitivity analysis dataset**

| **Predictor** | **Number** | **Pregnancy-related**  **complications, n (%)** | **Crude** |  | **Model 1 a** |  | **Model 2 b** |  |
| --- | --- | --- | --- | --- | --- | --- | --- | --- |
|  |  | ***OR (95%CI)*** | ***P value*** | ***OR (95%CI)*** | ***P value*** | ***OR (95%CI)*** | ***P value*** |
|  |  |  |  |  |  |  |  |  |
| Gestational hypertension | 10836 | 364 (3.4) | 1.92 (1.43~2.58) | **<0.001** | 1.65 (1.21~2.26) | **0.002** | 0.97 (0.62~1.53) | 0.911 |
|  |  |  |  |  |  |  |  |  |
| Preeclampsia | 10836 | 182 (1.7) | 1.63 (1.08~2.48) | **0.020** | 1.01 (0.64~1.57) | 0.979 | 0.48 (0.25~0.9) | **0.022** |
|  |  |  |  |  |  |  |  |  |
| Placental abruption | 10836 | 250 (2.3) | 1.13 (0.78~1.62) | 0.519 | 1.16 (0.78~1.72) | 0.454 | 1.27 (0.73~2.2) | 0.395 |
|  |  |  |  |  |  |  |  |  |
| Fetal distress | 10836 | 2035 (18.8) | 0.97 (0.84~1.12) | 0.684 | 1.11 (0.95~1.29) | 0.175 | 1.04 (0.84~1.28) | 0.736 |
|  |  |  |  |  |  |  |  |  |
| Premature rupture of membranes | 10836 | 2875 (26.5) | 0.84 (0.75~0.96) | **0.008** | 0.99 (0.86~1.13) | 0.867 | 1.08 (0.9~1.3) | 0.426 |

**a** Model 1 adjusted for pre-pregnancy BMI, maternal age, assisted reproduction, abortion history, gravidity, parity, delivery gestations, and gestational weight gain;

**b**Model 2 further adjusted for gestational week at the examination, systolic blood pressure, diastolic blood pressure, total cholesterol, low density lipoprotein cholesterol, high density lipoprotein cholesterol, hemoglobin, uric acid, creatinine, alanine aminotransferase, and aspartate aminotransferase.

The bolded P values indicates statistical significance.

**Supplementary Table 4 ROC analysis of the triglyceride-glucose (TyG) index for detecting pregnancy-related complications in sensitivity analysis dataset**

| **Predictor** | **AUC (95%CI), %** | **Threshold** | **Sensitivity** | **Specificity** | **PPV** | **NPV** | **Accuracy** | **Precision** |
| --- | --- | --- | --- | --- | --- | --- | --- | --- |
|  |  |  |  |  |  |  |  |  |
| **Gestational diabetes mellitus** | **63.71 (62.49~64.94)** | 8.549 | 0.555 | 0.649 | 0.335 | 0.820 | 0.626 | 0.335 |
|  |  |  |  |  |  |  |  |  |
| **Gestational hypertension** | **55.59 (52.44~58.74)** | 8.547 | 0.503 | 0.601 | 0.042 | 0.972 | 0.597 | 0.042 |
|  |  |  |  |  |  |  |  |  |
| **Preeclampsia** | **54.82 (50.32~59.32)** | 8.560 | 0.495 | 0.614 | 0.021 | 0.986 | 0.612 | 0.021 |
|  |  |  |  |  |  |  |  |  |
| Placental abruption | 50.78 (47.13~54.44) | 8.878 | 0.152 | 0.874 | 0.028 | 0.978 | 0.857 | 0.028 |
|  |  |  |  |  |  |  |  |  |
| Fetal distress | 50.23 (48.82~51.63) | 8.862 | 0.678 | 0.355 | 0.293 | 0.737 | 0.446 | 0.293 |
|  |  |  |  |  |  |  |  |  |
| **Premature rupture of membranes** | **51.74 (50.20~52.97)** | 8.574 | 0.652 | 0.381 | 0.275 | 0.752 | 0.453 | 0.275 |

Abbreviations: AUC: area under curve; PPV positive predictive value; NPV, negative predictive value

The bolded AUC (95%CI) indicates statistical significance.

**
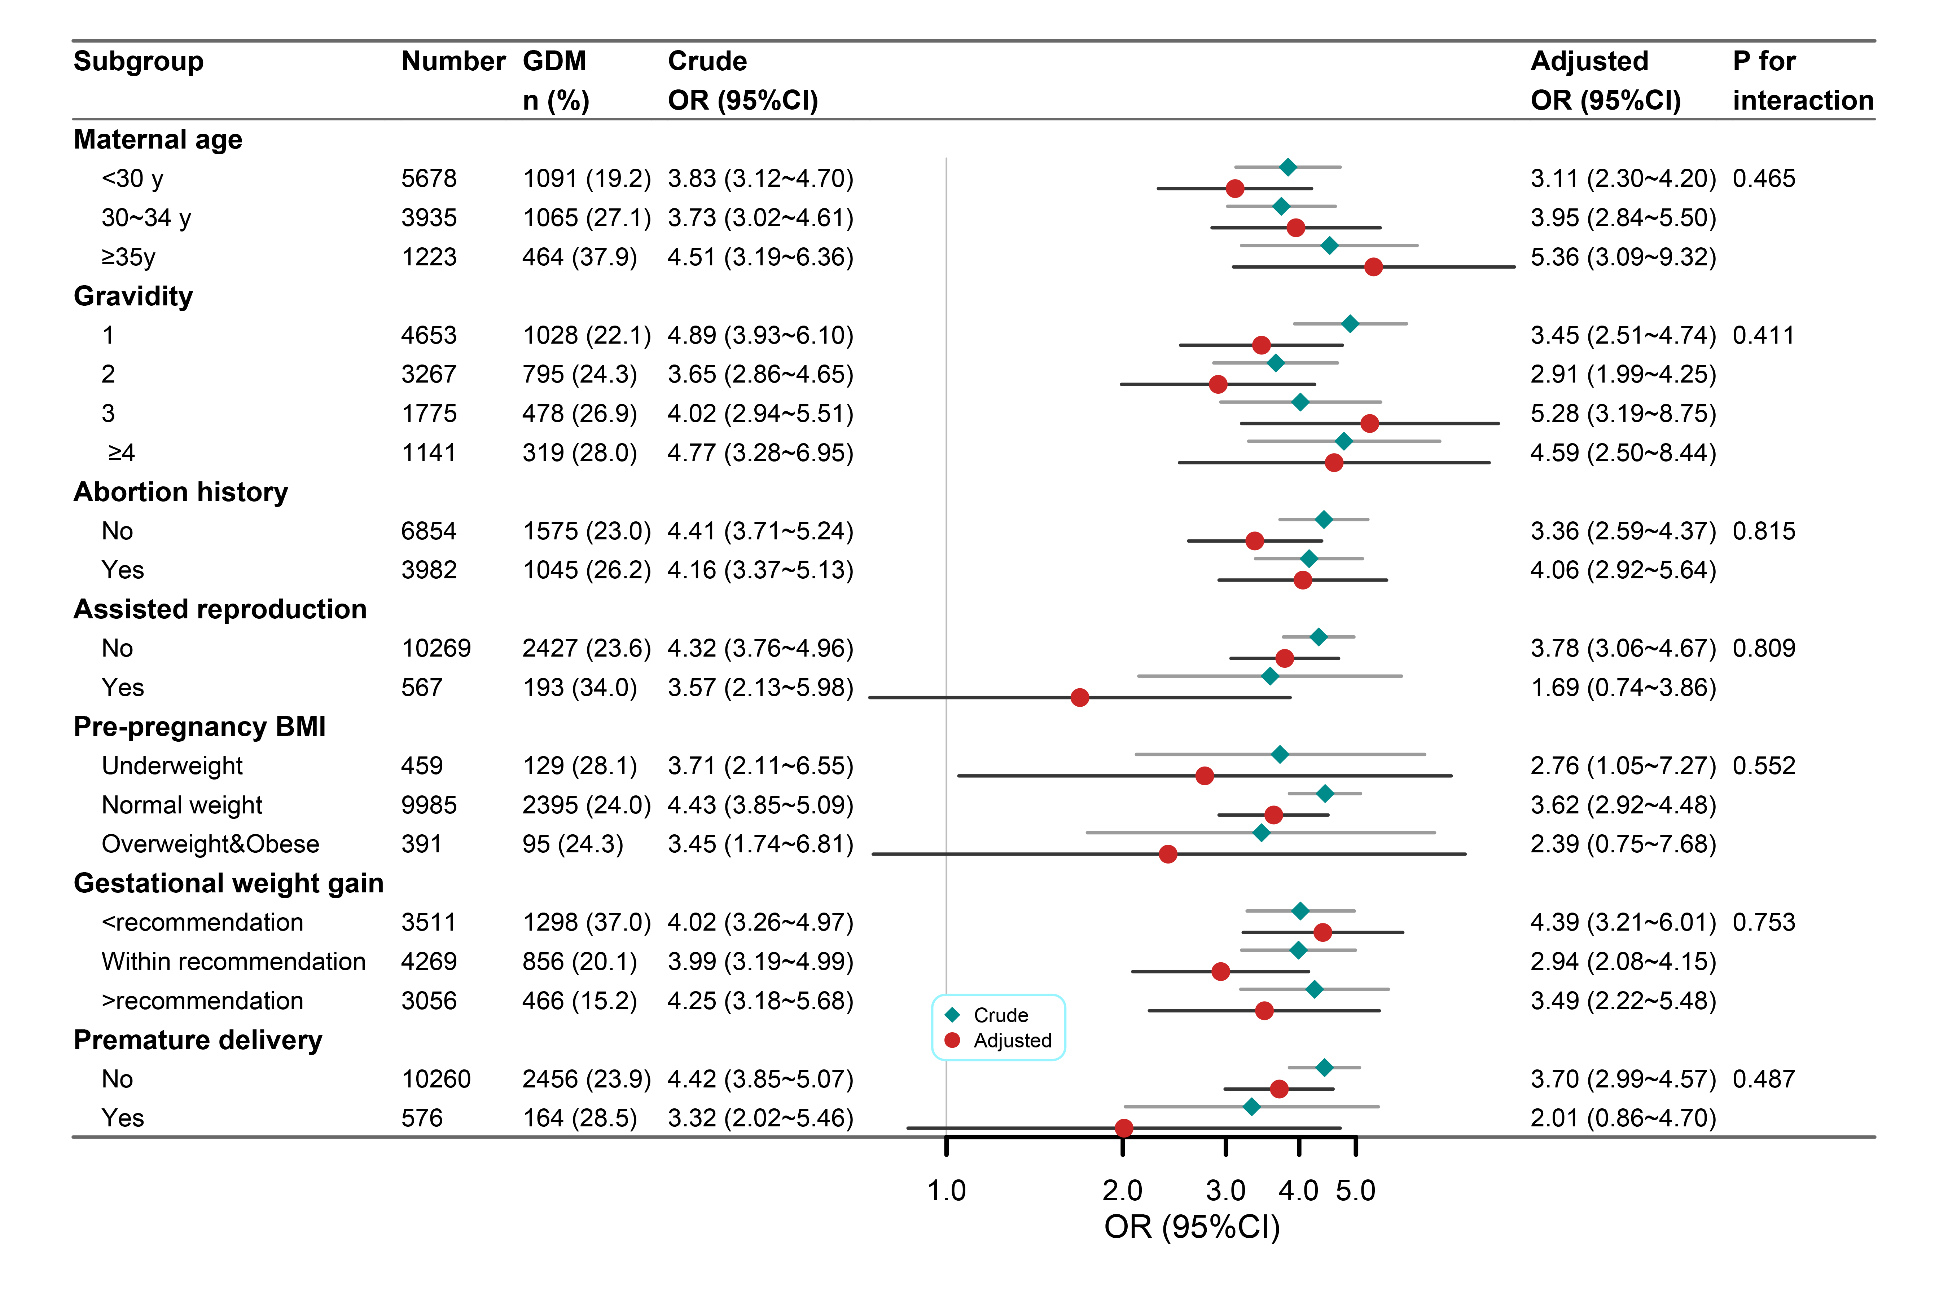
**

**Supplementary Figure 3 Subgroup analysis of the association between triglyceride-glucose (TyG) index and risk of gestational diabetes mellitus (GDM) in sensitivity analysis dataset**

Models adjusted for race, pre-pregnancy BMI, maternal age, assisted reproduction, abortion history, gravidity, parity, gestational weight gain, delivery gestations, gestational week at the examination, systolic blood pressure, diastolic blood pressure, total cholesterol, low density lipoprotein cholesterol, high density lipoprotein cholesterol, hemoglobin, uric acid, creatinine, alanine aminotransferase, and aspartate aminotransferase (not for adjusted variables stratified analysis).
